# Supplementary material for: Comparative Mortality and Adaptation of a Smurf Assay in Two Species of Tenebrionid Beetles Exposed to Bacillus thuringiensis
Source: Insects. 2020 Apr 24;11(4):261. doi: 10.3390/insects11040261 (PMC7240575; doi:10.3390/insects11040261)
Supplement: Supplementary file 1 [file insects-11-00261-s001.zip › Tenebrios.csv]

ID	size	replicate	treatment	day.disruption	disruption	day.death	death
A1	4-5 mm	1	tenebrionis	2	0	2	1
A2	4-5 mm	1	tenebrionis	3	0	3	1
A3	4-5 mm	1	tenebrionis	5	0	5	1
A4	4-5 mm	1	tenebrionis	2	0	2	1
A5	4-5 mm	1	tenebrionis	7	0	7	1
A6	4-5 mm	1	tenebrionis	7	0	7	1
A7	4-5 mm	1	tenebrionis	3	0	3	1
A8	4-5 mm	1	tenebrionis	5	0	5	1
B1	4-5 mm	1	tenebrionis	4	0	4	1
B2	4-5 mm	1	tenebrionis	3	1	3	1
B3	4-5 mm	1	tenebrionis	2	0	2	1
B4	4-5 mm	1	tenebrionis	6	0	6	1
B5	4-5 mm	1	tenebrionis	2	0	2	1
B6	4-5 mm	1	tenebrionis	2	0	2	1
B7	4-5 mm	1	tenebrionis	3	0	3	1
B8	4-5 mm	1	tenebrionis	6	0	6	1
C1	4-5 mm	1	tenebrionis	6	0	6	1
C2	4-5 mm	1	tenebrionis	7	0	7	1
C3	4-5 mm	1	tenebrionis	6	0	6	1
C4	4-5 mm	1	tenebrionis	6	0	6	1
C5	4-5 mm	1	tenebrionis	4	0	4	1
C6	4-5 mm	1	tenebrionis	5	0	5	1
C7	4-5 mm	1	tenebrionis	5	0	5	1
C8	4-5 mm	1	tenebrionis	4	0	4	1
D1	4-5 mm	1	tenebrionis	4	0	4	1
D2	4-5 mm	1	tenebrionis	4	0	4	1
D3	4-5 mm	1	tenebrionis	2	1	2	1
D4	4-5 mm	1	tenebrionis	2	0	2	1
D5	4-5 mm	1	tenebrionis	7	0	7	1
D6	4-5 mm	1	tenebrionis	7	0	7	1
D7	4-5 mm	1	tenebrionis	6	0	6	1
D8	4-5 mm	1	tenebrionis	1	1	3	1
E1	4-5 mm	1	tenebrionis	7	0	7	1
E2	4-5 mm	1	tenebrionis	7	0	7	1
E3	4-5 mm	1	tenebrionis	6	0	6	1
E4	4-5 mm	1	tenebrionis	6	0	6	1
E5	4-5 mm	1	tenebrionis	6	0	6	1
E6	4-5 mm	1	tenebrionis	7	0	7	0
E7	4-5 mm	1	tenebrionis	4	0	4	1
E8	4-5 mm	1	tenebrionis	4	0	4	1
F1	4-5 mm	1	tenebrionis	7	0	7	0
F2	4-5 mm	1	tenebrionis	7	0	7	0
F3	4-5 mm	1	tenebrionis	6	0	6	1
F4	4-5 mm	1	tenebrionis	4	0	4	1
F5	4-5 mm	1	tenebrionis	6	0	6	1
F6	4-5 mm	1	tenebrionis	4	1	4	1
F7	4-5 mm	1	tenebrionis	7	0	7	1
F8	4-5 mm	1	tenebrionis	7	0	7	0
A1	4-5 mm	1	control	7	0	7	0
A2	4-5 mm	1	control	7	0	7	0
A3	4-5 mm	1	control	7	0	7	0
A4	4-5 mm	1	control	2	0	2	1
A5	4-5 mm	1	control	7	0	7	0
A6	4-5 mm	1	control	7	0	7	0
A7	4-5 mm	1	control	7	0	7	0
A8	4-5 mm	1	control	7	0	7	0
B1	4-5 mm	1	control	7	0	7	0
B2	4-5 mm	1	control	7	0	7	0
B3	4-5 mm	1	control	7	0	7	0
B4	4-5 mm	1	control	5	0	5	1
B5	4-5 mm	1	control	2	0	2	1
B6	4-5 mm	1	control	7	0	7	0
B7	4-5 mm	1	control	7	0	7	0
B8	4-5 mm	1	control	6	0	6	1
C1	4-5 mm	1	control	5	0	5	1
C2	4-5 mm	1	control	7	0	7	0
C3	4-5 mm	1	control	7	0	7	0
C4	4-5 mm	1	control	7	0	7	0
C5	4-5 mm	1	control	7	0	7	0
C6	4-5 mm	1	control	7	0	7	0
C7	4-5 mm	1	control	7	0	7	0
C8	4-5 mm	1	control	7	0	7	0
D1	4-5 mm	1	control	7	0	7	0
D2	4-5 mm	1	control	7	0	7	0
D3	4-5 mm	1	control	7	0	7	0
D4	4-5 mm	1	control	7	0	7	0
D5	4-5 mm	1	control	7	0	7	0
D6	4-5 mm	1	control	7	0	7	0
D7	4-5 mm	1	control	5	0	5	1
D8	4-5 mm	1	control	7	0	7	0
E1	4-5 mm	1	control	7	0	7	0
E2	4-5 mm	1	control	6	0	6	1
E3	4-5 mm	1	control	3	0	3	1
E4	4-5 mm	1	control	3	1	3	1
E5	4-5 mm	1	control	7	0	7	0
E6	4-5 mm	1	control	7	0	7	0
E7	4-5 mm	1	control	7	0	7	0
E8	4-5 mm	1	control	7	0	7	0
F1	4-5 mm	1	control	7	0	7	0
F2	4-5 mm	1	control	7	0	7	0
F3	4-5 mm	1	control	7	0	7	0
F4	4-5 mm	1	control	7	0	7	0
F5	4-5 mm	1	control	6	0	6	1
F6	4-5 mm	1	control	7	0	7	0
F7	4-5 mm	1	control	7	0	7	0
A1	4-5 mm	2	tenebrionis	2	0	2	1
A2	4-5 mm	2	tenebrionis	2	0	2	1
A3	4-5 mm	2	tenebrionis	3	0	3	1
A4	4-5 mm	2	tenebrionis	3	0	3	1
A5	4-5 mm	2	tenebrionis	3	0	3	1
A6	4-5 mm	2	tenebrionis	2	0	2	1
A7	4-5 mm	2	tenebrionis	1	0	1	1
A8	4-5 mm	2	tenebrionis	4	0	4	1
B1	4-5 mm	2	tenebrionis	2	0	2	1
B2	4-5 mm	2	tenebrionis	7	0	7	0
B3	4-5 mm	2	tenebrionis	3	0	3	1
B4	4-5 mm	2	tenebrionis	2	1	2	1
B5	4-5 mm	2	tenebrionis	2	0	2	1
B6	4-5 mm	2	tenebrionis	2	0	2	1
B7	4-5 mm	2	tenebrionis	2	0	2	1
B8	4-5 mm	2	tenebrionis	4	0	4	1
C1	4-5 mm	2	tenebrionis	2	0	2	1
C2	4-5 mm	2	tenebrionis	2	0	2	1
C3	4-5 mm	2	tenebrionis	4	1	4	1
C4	4-5 mm	2	tenebrionis	2	0	2	1
C5	4-5 mm	2	tenebrionis	2	0	2	1
C6	4-5 mm	2	tenebrionis	7	0	7	0
C7	4-5 mm	2	tenebrionis	7	0	7	0
C8	4-5 mm	2	tenebrionis	2	0	2	1
D1	4-5 mm	2	tenebrionis	2	0	2	1
D2	4-5 mm	2	tenebrionis	2	0	2	1
D3	4-5 mm	2	tenebrionis	2	0	2	1
D4	4-5 mm	2	tenebrionis	3	0	3	1
D5	4-5 mm	2	tenebrionis	4	0	4	1
D6	4-5 mm	2	tenebrionis	2	0	2	1
D7	4-5 mm	2	tenebrionis	5	0	5	1
D8	4-5 mm	2	tenebrionis	6	0	6	1
E1	4-5 mm	2	tenebrionis	1	0	1	1
E2	4-5 mm	2	tenebrionis	2	0	2	1
E3	4-5 mm	2	tenebrionis	2	0	2	1
E4	4-5 mm	2	tenebrionis	4	0	4	1
E5	4-5 mm	2	tenebrionis	7	0	7	1
E6	4-5 mm	2	tenebrionis	2	0	2	1
E7	4-5 mm	2	tenebrionis	3	0	3	1
E8	4-5 mm	2	tenebrionis	2	0	2	1
F1	4-5 mm	2	tenebrionis	3	0	3	1
F2	4-5 mm	2	tenebrionis	1	0	1	1
F3	4-5 mm	2	tenebrionis	3	0	3	1
F4	4-5 mm	2	tenebrionis	6	0	6	1
F5	4-5 mm	2	tenebrionis	3	0	3	1
F6	4-5 mm	2	tenebrionis	2	0	2	1
F7	4-5 mm	2	tenebrionis	2	0	2	1
F8	4-5 mm	2	tenebrionis	5	0	5	1
A1	4-5 mm	2	control	7	0	7	0
A2	4-5 mm	2	control	7	0	7	0
A3	4-5 mm	2	control	2	0	2	1
A4	4-5 mm	2	control	7	0	7	0
A5	4-5 mm	2	control	3	0	3	1
A6	4-5 mm	2	control	7	0	7	0
A7	4-5 mm	2	control	7	0	7	0
A8	4-5 mm	2	control	7	0	7	1
B1	4-5 mm	2	control	7	0	7	0
B2	4-5 mm	2	control	7	0	7	0
B3	4-5 mm	2	control	7	0	7	0
B4	4-5 mm	2	control	7	0	7	0
B5	4-5 mm	2	control	2	0	2	1
B6	4-5 mm	2	control	7	0	7	0
B7	4-5 mm	2	control	7	0	7	0
B8	4-5 mm	2	control	3	0	3	1
C1	4-5 mm	2	control	7	0	7	0
C2	4-5 mm	2	control	4	0	4	1
C3	4-5 mm	2	control	7	0	7	0
C4	4-5 mm	2	control	7	0	7	0
C5	4-5 mm	2	control	7	0	7	0
C6	4-5 mm	2	control	7	0	7	0
C7	4-5 mm	2	control	7	0	7	0
C8	4-5 mm	2	control	7	0	7	0
D1	4-5 mm	2	control	7	0	7	0
D2	4-5 mm	2	control	7	0	7	0
D3	4-5 mm	2	control	7	0	7	0
D4	4-5 mm	2	control	7	0	7	0
D5	4-5 mm	2	control	7	0	7	0
D6	4-5 mm	2	control	7	0	7	0
D7	4-5 mm	2	control	2	0	2	1
D8	4-5 mm	2	control	7	0	7	0
E1	4-5 mm	2	control	7	0	7	0
E2	4-5 mm	2	control	7	0	7	0
E3	4-5 mm	2	control	7	0	7	0
E4	4-5 mm	2	control	1	0	1	1
E5	4-5 mm	2	control	7	0	7	0
E6	4-5 mm	2	control	7	0	7	0
E7	4-5 mm	2	control	7	0	7	0
E8	4-5 mm	2	control	7	0	7	0
F1	4-5 mm	2	control	7	0	7	0
F2	4-5 mm	2	control	7	0	7	0
F3	4-5 mm	2	control	7	0	7	0
F4	4-5 mm	2	control	7	0	7	0
F5	4-5 mm	2	control	7	0	7	0
F6	4-5 mm	2	control	7	0	7	0
F7	4-5 mm	2	control	7	0	7	0
A1	6-7 mm	3	tenebrionis	7	0	7	0
A2	6-7 mm	3	tenebrionis	2	1	2	1
A3	6-7 mm	3	tenebrionis	4	0	4	1
A4	6-7 mm	3	tenebrionis	3	0	3	1
A5	6-7 mm	3	tenebrionis	6	1	6	1
A6	6-7 mm	3	tenebrionis	7	0	7	0
A7	6-7 mm	3	tenebrionis	5	1	6	1
A8	6-7 mm	3	tenebrionis	3	0	3	1
B1	6-7 mm	3	tenebrionis	7	0	7	0
B2	6-7 mm	3	tenebrionis	7	0	7	1
B3	6-7 mm	3	tenebrionis	7	0	7	1
B4	6-7 mm	3	tenebrionis	5	0	5	1
B5	6-7 mm	3	tenebrionis	7	0	7	0
B6	6-7 mm	3	tenebrionis	7	0	7	1
B7	6-7 mm	3	tenebrionis	7	0	7	0
B8	6-7 mm	3	tenebrionis	7	0	7	0
C1	6-7 mm	3	tenebrionis	7	0	7	0
C2	6-7 mm	3	tenebrionis	3	0	3	1
C3	6-7 mm	3	tenebrionis	7	0	7	1
C4	6-7 mm	3	tenebrionis	7	0	7	0
C5	6-7 mm	3	tenebrionis	2	0	2	1
C6	6-7 mm	3	tenebrionis	3	1	4	1
C7	6-7 mm	3	tenebrionis	2	0	2	1
C8	6-7 mm	3	tenebrionis	2	1	3	1
D1	6-7 mm	3	tenebrionis	6	0	6	1
D2	6-7 mm	3	tenebrionis	7	0	7	0
D3	6-7 mm	3	tenebrionis	7	0	7	0
D4	6-7 mm	3	tenebrionis	3	0	3	1
D5	6-7 mm	3	tenebrionis	7	0	7	0
D6	6-7 mm	3	tenebrionis	7	0	7	0
D7	6-7 mm	3	tenebrionis	7	0	7	1
D8	6-7 mm	3	tenebrionis	7	0	7	1
E1	6-7 mm	3	tenebrionis	4	0	4	1
E2	6-7 mm	3	tenebrionis	4	1	4	1
E3	6-7 mm	3	tenebrionis	7	0	7	0
E4	6-7 mm	3	tenebrionis	3	0	3	1
E5	6-7 mm	3	tenebrionis	5	0	5	1
E6	6-7 mm	3	tenebrionis	5	0	5	1
E7	6-7 mm	3	tenebrionis	7	0	7	0
E8	6-7 mm	3	tenebrionis	7	0	7	0
F1	6-7 mm	3	tenebrionis	3	0	3	1
F2	6-7 mm	3	tenebrionis	6	0	6	1
F3	6-7 mm	3	tenebrionis	7	0	7	0
F4	6-7 mm	3	tenebrionis	3	0	3	1
F5	6-7 mm	3	tenebrionis	7	0	7	1
F6	6-7 mm	3	tenebrionis	2	0	2	1
F7	6-7 mm	3	tenebrionis	3	0	3	1
F8	6-7 mm	3	tenebrionis	7	0	7	0
A1	6-7 mm	4	tenebrionis	6	0	6	1
A2	6-7 mm	4	tenebrionis	7	0	7	0
A3	6-7 mm	4	tenebrionis	7	0	7	0
A4	6-7 mm	4	tenebrionis	7	0	7	0
A5	6-7 mm	4	tenebrionis	7	0	7	1
A6	6-7 mm	4	tenebrionis	3	0	3	1
A7	6-7 mm	4	tenebrionis	5	0	5	1
A8	6-7 mm	4	tenebrionis	7	0	7	0
B1	6-7 mm	4	tenebrionis	7	0	7	0
B2	6-7 mm	4	tenebrionis	5	0	5	1
B3	6-7 mm	4	tenebrionis	7	0	7	0
B4	6-7 mm	4	tenebrionis	6	0	6	1
B5	6-7 mm	4	tenebrionis	5	0	5	1
B6	6-7 mm	4	tenebrionis	4	0	4	1
B7	6-7 mm	4	tenebrionis	2	0	2	1
B8	6-7 mm	4	tenebrionis	7	0	7	0
C1	6-7 mm	4	tenebrionis	3	0	3	1
C2	6-7 mm	4	tenebrionis	7	0	7	0
C3	6-7 mm	4	tenebrionis	7	0	7	0
C4	6-7 mm	4	tenebrionis	3	1	4	1
C5	6-7 mm	4	tenebrionis	7	0	7	0
C6	6-7 mm	4	tenebrionis	3	1	4	1
C7	6-7 mm	4	tenebrionis	6	0	6	1
C8	6-7 mm	4	tenebrionis	5	0	5	1
D1	6-7 mm	4	tenebrionis	7	0	7	0
D2	6-7 mm	4	tenebrionis	6	0	6	1
D3	6-7 mm	4	tenebrionis	7	0	7	0
D4	6-7 mm	4	tenebrionis	3	0	3	1
D5	6-7 mm	4	tenebrionis	6	0	6	1
D6	6-7 mm	4	tenebrionis	2	1	2	1
D7	6-7 mm	4	tenebrionis	3	0	3	1
D8	6-7 mm	4	tenebrionis	7	0	7	0
E1	6-7 mm	4	tenebrionis	7	0	7	0
E2	6-7 mm	4	tenebrionis	5	0	5	1
E3	6-7 mm	4	tenebrionis	6	0	6	1
E4	6-7 mm	4	tenebrionis	5	0	5	1
E5	6-7 mm	4	tenebrionis	7	0	7	0
E6	6-7 mm	4	tenebrionis	4	0	4	1
E7	6-7 mm	4	tenebrionis	7	0	7	0
E8	6-7 mm	4	tenebrionis	7	0	7	0
F1	6-7 mm	4	tenebrionis	7	0	7	0
F2	6-7 mm	4	tenebrionis	7	0	7	0
F3	6-7 mm	4	tenebrionis	7	0	7	0
F4	6-7 mm	4	tenebrionis	2	0	2	1
F5	6-7 mm	4	tenebrionis	2	0	2	1
F6	6-7 mm	4	tenebrionis	2	0	2	1
F7	6-7 mm	4	tenebrionis	6	0	6	1
A1	6-7 mm	4	tenebrionis	7	0	7	0
A2	6-7 mm	3	control	7	0	7	0
A3	6-7 mm	3	control	7	0	7	0
A4	6-7 mm	3	control	7	0	7	0
A5	6-7 mm	3	control	7	0	7	0
A6	6-7 mm	3	control	7	0	7	0
A7	6-7 mm	3	control	7	0	7	0
A8	6-7 mm	3	control	7	0	7	0
B1	6-7 mm	3	control	7	0	7	0
B2	6-7 mm	3	control	7	0	7	0
B3	6-7 mm	3	control	7	0	7	0
B4	6-7 mm	3	control	7	0	7	0
B5	6-7 mm	3	control	7	0	7	0
B6	6-7 mm	3	control	7	0	7	0
B7	6-7 mm	3	control	7	0	7	0
B8	6-7 mm	3	control	7	0	7	0
C1	6-7 mm	3	control	7	0	7	0
C2	6-7 mm	3	control	7	0	7	0
C3	6-7 mm	3	control	7	0	7	0
C4	6-7 mm	3	control	7	0	7	0
C5	6-7 mm	3	control	7	0	7	0
C6	6-7 mm	3	control	7	0	7	0
C7	6-7 mm	3	control	7	0	7	0
C8	6-7 mm	3	control	7	0	7	0
D1	6-7 mm	3	control	7	0	7	0
D2	6-7 mm	3	control	7	0	7	0
D3	6-7 mm	3	control	7	0	7	0
D4	6-7 mm	3	control	7	0	7	0
D5	6-7 mm	3	control	7	0	7	0
D6	6-7 mm	3	control	7	0	7	0
D7	6-7 mm	3	control	7	0	7	0
D8	6-7 mm	3	control	7	0	7	0
E1	6-7 mm	3	control	7	0	7	0
E2	6-7 mm	3	control	7	0	7	0
E3	6-7 mm	3	control	7	0	7	0
E4	6-7 mm	3	control	7	0	7	0
E5	6-7 mm	3	control	7	0	7	0
E6	6-7 mm	3	control	7	0	7	0
E7	6-7 mm	3	control	7	0	7	0
E8	6-7 mm	3	control	7	0	7	0
F1	6-7 mm	3	control	7	0	7	0
F2	6-7 mm	3	control	7	0	7	0
F3	6-7 mm	3	control	7	0	7	0
F4	6-7 mm	3	control	7	0	7	0
F5	6-7 mm	3	control	7	0	7	0
F6	6-7 mm	3	control	7	0	7	0
F7	6-7 mm	3	control	7	0	7	0
A1	6-7 mm	3	control	7	0	7	0
A2	6-7 mm	3	control	7	0	7	0
A3	6-7 mm	4	control	7	0	7	0
A4	6-7 mm	4	control	7	0	7	0
A5	6-7 mm	4	control	7	0	7	0
A6	6-7 mm	4	control	7	0	7	0
A7	6-7 mm	4	control	7	0	7	0
A8	6-7 mm	4	control	7	0	7	0
B1	6-7 mm	4	control	7	0	7	0
B2	6-7 mm	4	control	7	0	7	0
B3	6-7 mm	4	control	7	0	7	0
B4	6-7 mm	4	control	7	0	7	0
B5	6-7 mm	4	control	7	0	7	0
B6	6-7 mm	4	control	7	0	7	0
B7	6-7 mm	4	control	7	0	7	0
B8	6-7 mm	4	control	4	1	5	1
C1	6-7 mm	4	control	7	0	7	0
C2	6-7 mm	4	control	7	0	7	0
C3	6-7 mm	4	control	7	0	7	0
C4	6-7 mm	4	control	7	0	7	0
C5	6-7 mm	4	control	7	0	7	0
C6	6-7 mm	4	control	7	0	7	0
C7	6-7 mm	4	control	7	0	7	0
C8	6-7 mm	4	control	7	0	7	0
D1	6-7 mm	4	control	7	0	7	0
D2	6-7 mm	4	control	7	0	7	0
D3	6-7 mm	4	control	7	0	7	0
D4	6-7 mm	4	control	7	0	7	0
D5	6-7 mm	4	control	7	0	7	0
D6	6-7 mm	4	control	7	0	7	0
D7	6-7 mm	4	control	7	0	7	0
D8	6-7 mm	4	control	7	0	7	0
E1	6-7 mm	4	control	7	0	7	0
E2	6-7 mm	4	control	7	0	7	0
E3	6-7 mm	4	control	7	0	7	0
E4	6-7 mm	4	control	7	0	7	0
E5	6-7 mm	4	control	7	0	7	0
E6	6-7 mm	4	control	7	0	7	0
E7	6-7 mm	4	control	7	0	7	0
E8	6-7 mm	4	control	7	0	7	0
F1	6-7 mm	4	control	7	0	7	0
F2	6-7 mm	4	control	7	0	7	0
F3	6-7 mm	4	control	7	0	7	0
F4	6-7 mm	4	control	7	0	7	0
F5	6-7 mm	4	control	7	0	7	0
F6	6-7 mm	4	control	7	0	7	0
