# Supplementary material for: Comparative Mortality and Adaptation of a Smurf Assay in Two Species of Tenebrionid Beetles Exposed to Bacillus thuringiensis
Source: Insects. 2020 Apr 24;11(4):261. doi: 10.3390/insects11040261 (PMC7240575; doi:10.3390/insects11040261)
Supplement: Supplementary file 1 [file insects-11-00261-s001.zip › Triboliums.csv]

ID	age	replicate	treatment	day.disruption	disruption	day.death	death
A1	15 days	1	tenebrionis	5	0	5	1
A2	15 days	1	tenebrionis	3	0	3	1
A3	15 days	1	tenebrionis	7	0	7	1
A4	15 days	1	tenebrionis	7	0	7	1
A5	15 days	1	tenebrionis	4	1	4	1
A6	15 days	1	tenebrionis	5	0	5	1
A7	15 days	1	tenebrionis	1	1	1	1
A8	15 days	1	tenebrionis	7	0	7	0
B1	15 days	1	tenebrionis	4	0	4	1
B2	15 days	1	tenebrionis	7	0	7	0
B3	15 days	1	tenebrionis	6	0	6	1
B4	15 days	1	tenebrionis	2	0	2	1
B5	15 days	1	tenebrionis	7	0	7	1
B6	15 days	1	tenebrionis	2	0	2	1
B7	15 days	1	tenebrionis	5	0	5	1
B8	15 days	1	tenebrionis	1	0	1	1
C1	15 days	1	tenebrionis	2	0	2	1
C2	15 days	1	tenebrionis	3	0	3	1
C3	15 days	1	tenebrionis	7	0	7	1
C4	15 days	1	tenebrionis	7	0	7	1
C5	15 days	1	tenebrionis	7	0	7	1
C6	15 days	1	tenebrionis	5	0	5	1
C7	15 days	1	tenebrionis	7	0	7	1
C8	15 days	1	tenebrionis	5	0	5	1
D1	15 days	1	tenebrionis	7	0	7	0
D2	15 days	1	tenebrionis	4	0	4	1
D3	15 days	1	tenebrionis	7	0	7	1
D4	15 days	1	tenebrionis	2	0	2	1
D5	15 days	1	tenebrionis	7	1	7	0
D6	15 days	1	tenebrionis	6	0	6	1
D7	15 days	1	tenebrionis	7	0	7	0
D8	15 days	1	tenebrionis	7	0	7	1
E1	15 days	1	tenebrionis	1	0	1	1
E2	15 days	1	tenebrionis	6	0	6	1
E3	15 days	1	tenebrionis	7	0	7	0
E4	15 days	1	tenebrionis	6	0	6	1
E5	15 days	1	tenebrionis	1	0	1	1
E6	15 days	1	tenebrionis	5	0	5	1
E7	15 days	1	tenebrionis	2	0	2	1
E8	15 days	1	tenebrionis	6	0	6	1
F1	15 days	1	tenebrionis	4	1	4	1
F2	15 days	1	tenebrionis	4	1	4	1
F3	15 days	1	tenebrionis	7	0	7	0
F4	15 days	1	tenebrionis	5	0	5	1
F5	15 days	1	tenebrionis	2	0	2	1
F6	15 days	1	tenebrionis	5	0	5	1
F7	15 days	1	tenebrionis	4	0	4	1
F8	15 days	1	tenebrionis	6	0	6	1
A1	15 days	1	tolworthi	7	0	7	0
A2	15 days	1	tolworthi	6	1	6	1
A3	15 days	1	tolworthi	7	0	7	1
A4	15 days	1	tolworthi	6	0	6	1
A5	15 days	1	tolworthi	7	0	7	0
A6	15 days	1	tolworthi	7	0	7	1
A7	15 days	1	tolworthi	7	0	7	0
A8	15 days	1	tolworthi	7	0	7	0
B1	15 days	1	tolworthi	7	0	7	0
B2	15 days	1	tolworthi	7	0	7	0
B3	15 days	1	tolworthi	6	0	6	1
B4	15 days	1	tolworthi	6	0	6	1
B5	15 days	1	tolworthi	6	0	6	1
B6	15 days	1	tolworthi	6	0	6	1
B7	15 days	1	tolworthi	5	0	5	1
B8	15 days	1	tolworthi	6	0	6	1
C1	15 days	1	tolworthi	7	0	7	0
C2	15 days	1	tolworthi	7	0	7	0
C3	15 days	1	tolworthi	6	0	6	1
C4	15 days	1	tolworthi	7	0	7	1
C5	15 days	1	tolworthi	7	0	7	1
C6	15 days	1	tolworthi	6	0	6	1
C7	15 days	1	tolworthi	7	0	7	0
C8	15 days	1	tolworthi	6	0	6	1
D1	15 days	1	tolworthi	7	0	7	0
D2	15 days	1	tolworthi	7	0	7	1
D3	15 days	1	tolworthi	7	0	7	0
D4	15 days	1	tolworthi	7	0	7	0
D5	15 days	1	tolworthi	5	0	5	1
D6	15 days	1	tolworthi	2	0	2	1
D7	15 days	1	tolworthi	6	0	6	1
D8	15 days	1	tolworthi	7	0	7	0
E1	15 days	1	tolworthi	7	0	7	0
E2	15 days	1	tolworthi	7	0	7	0
E3	15 days	1	tolworthi	7	0	7	0
E4	15 days	1	tolworthi	7	0	7	0
E5	15 days	1	tolworthi	7	0	7	0
E6	15 days	1	tolworthi	6	0	6	1
E7	15 days	1	tolworthi	7	0	7	1
E8	15 days	1	tolworthi	7	0	7	0
F1	15 days	1	tolworthi	7	0	7	0
F2	15 days	1	tolworthi	6	0	6	1
F3	15 days	1	tolworthi	6	0	6	1
F4	15 days	1	tolworthi	7	0	7	1
F5	15 days	1	tolworthi	7	0	7	0
F6	15 days	1	tolworthi	5	0	5	1
F7	15 days	1	tolworthi	7	0	7	0
F8	15 days	1	tolworthi	7	0	7	0
A1	15 days	1	control	7	0	7	0
A2	15 days	1	control	7	0	7	0
A3	15 days	1	control	7	0	7	0
A4	15 days	1	control	7	0	7	0
A5	15 days	1	control	7	0	7	0
A6	15 days	1	control	6	0	6	1
A7	15 days	1	control	7	0	7	0
A8	15 days	1	control	7	0	7	0
B1	15 days	1	control	7	0	7	0
B2	15 days	1	control	7	0	7	0
B3	15 days	1	control	7	0	7	0
B4	15 days	1	control	7	0	7	0
B5	15 days	1	control	2	0	2	1
B6	15 days	1	control	7	0	7	0
B7	15 days	1	control	7	0	7	0
B8	15 days	1	control	4	0	4	1
C1	15 days	1	control	7	0	7	0
C2	15 days	1	control	3	0	3	1
C3	15 days	1	control	3	0	3	1
C4	15 days	1	control	7	0	7	0
C5	15 days	1	control	7	0	7	0
C6	15 days	1	control	4	0	4	1
C7	15 days	1	control	7	0	7	0
C8	15 days	1	control	4	0	4	1
D1	15 days	1	control	7	0	7	0
D2	15 days	1	control	7	0	7	0
D3	15 days	1	control	7	0	7	0
D4	15 days	1	control	3	0	3	1
D5	15 days	1	control	6	0	6	1
D6	15 days	1	control	7	0	7	0
D7	15 days	1	control	7	0	7	0
D8	15 days	1	control	7	0	7	0
E1	15 days	1	control	3	0	3	1
E2	15 days	1	control	7	0	7	0
E3	15 days	1	control	5	0	5	1
E4	15 days	1	control	7	0	7	0
E5	15 days	1	control	7	0	7	0
E6	15 days	1	control	7	0	7	0
E7	15 days	1	control	7	0	7	0
E8	15 days	1	control	7	0	7	0
F1	15 days	1	control	7	0	7	0
F2	15 days	1	control	7	0	7	0
F3	15 days	1	control	5	0	5	1
F4	15 days	1	control	7	0	7	0
F5	15 days	1	control	7	0	7	0
F6	15 days	1	control	7	0	7	0
F7	15 days	1	control	7	0	7	0
A1	15 days	2	tenebrionis	6	0	6	1
A2	15 days	2	tenebrionis	7	0	7	1
A3	15 days	2	tenebrionis	2	0	2	1
A4	15 days	2	tenebrionis	7	0	7	0
A5	15 days	2	tenebrionis	2	0	2	1
A6	15 days	2	tenebrionis	1	0	1	1
A7	15 days	2	tenebrionis	7	0	7	0
A8	15 days	2	tenebrionis	4	0	4	1
B1	15 days	2	tenebrionis	5	0	5	1
B2	15 days	2	tenebrionis	7	0	7	0
B3	15 days	2	tenebrionis	1	1	1	1
B4	15 days	2	tenebrionis	1	0	1	1
B5	15 days	2	tenebrionis	7	0	7	0
B6	15 days	2	tenebrionis	4	0	4	1
B7	15 days	2	tenebrionis	7	0	7	0
B8	15 days	2	tenebrionis	6	0	6	1
C1	15 days	2	tenebrionis	6	0	6	1
C2	15 days	2	tenebrionis	7	0	7	0
C3	15 days	2	tenebrionis	6	0	6	1
C4	15 days	2	tenebrionis	4	0	4	1
C5	15 days	2	tenebrionis	1	0	1	1
C6	15 days	2	tenebrionis	7	0	7	0
C7	15 days	2	tenebrionis	7	0	7	1
C8	15 days	2	tenebrionis	7	0	7	0
D1	15 days	2	tenebrionis	7	0	7	0
D2	15 days	2	tenebrionis	7	0	7	0
D3	15 days	2	tenebrionis	5	1	5	1
D4	15 days	2	tenebrionis	7	0	7	0
D5	15 days	2	tenebrionis	7	0	7	0
D6	15 days	2	tenebrionis	7	0	7	1
D7	15 days	2	tenebrionis	7	0	7	0
D8	15 days	2	tenebrionis	7	0	7	0
E1	15 days	2	tenebrionis	7	0	7	1
E2	15 days	2	tenebrionis	6	0	6	1
E3	15 days	2	tenebrionis	7	0	7	0
E4	15 days	2	tenebrionis	6	0	6	1
E5	15 days	2	tenebrionis	7	0	7	0
E6	15 days	2	tenebrionis	7	0	7	0
E7	15 days	2	tenebrionis	1	0	1	1
E8	15 days	2	tenebrionis	7	0	7	0
F1	15 days	2	tenebrionis	7	0	7	0
F2	15 days	2	tenebrionis	7	0	7	1
F3	15 days	2	tenebrionis	6	0	6	1
F4	15 days	2	tenebrionis	6	0	6	1
F5	15 days	2	tenebrionis	7	0	7	0
F6	15 days	2	tenebrionis	2	0	2	1
F7	15 days	2	tenebrionis	7	0	7	1
F8	15 days	2	tenebrionis	7	0	7	1
A1	15 days	2	tolworthi	7	0	7	1
A2	15 days	2	tolworthi	7	0	7	1
A3	15 days	2	tolworthi	7	0	7	0
A4	15 days	2	tolworthi	7	0	7	0
A5	15 days	2	tolworthi	7	0	7	1
A6	15 days	2	tolworthi	7	0	7	1
A7	15 days	2	tolworthi	6	0	6	1
A8	15 days	2	tolworthi	7	0	7	0
B1	15 days	2	tolworthi	7	0	7	1
B2	15 days	2	tolworthi	7	0	7	0
B3	15 days	2	tolworthi	7	0	7	0
B4	15 days	2	tolworthi	7	0	7	1
B5	15 days	2	tolworthi	7	0	7	0
B6	15 days	2	tolworthi	3	0	3	1
B7	15 days	2	tolworthi	7	0	7	1
B8	15 days	2	tolworthi	7	0	7	0
C1	15 days	2	tolworthi	7	0	7	0
C2	15 days	2	tolworthi	7	0	7	1
C3	15 days	2	tolworthi	7	0	7	0
C4	15 days	2	tolworthi	7	0	7	1
C5	15 days	2	tolworthi	7	0	7	1
C6	15 days	2	tolworthi	7	0	7	1
C7	15 days	2	tolworthi	7	1	7	1
C8	15 days	2	tolworthi	7	0	7	1
D1	15 days	2	tolworthi	7	0	7	0
D2	15 days	2	tolworthi	7	1	7	1
D3	15 days	2	tolworthi	7	0	7	0
D4	15 days	2	tolworthi	7	0	7	0
D5	15 days	2	tolworthi	7	0	7	0
D6	15 days	2	tolworthi	1	0	1	1
D7	15 days	2	tolworthi	7	0	7	0
D8	15 days	2	tolworthi	7	0	7	0
E1	15 days	2	tolworthi	7	0	7	0
E2	15 days	2	tolworthi	7	0	7	0
E3	15 days	2	tolworthi	7	0	7	1
E4	15 days	2	tolworthi	7	0	7	1
E5	15 days	2	tolworthi	7	0	7	0
E6	15 days	2	tolworthi	7	0	7	0
E7	15 days	2	tolworthi	7	0	7	0
E8	15 days	2	tolworthi	7	0	7	0
F1	15 days	2	tolworthi	7	0	7	0
F2	15 days	2	tolworthi	7	0	7	0
F3	15 days	2	tolworthi	7	0	7	1
F4	15 days	2	tolworthi	6	0	6	1
F5	15 days	2	tolworthi	7	0	7	0
F6	15 days	2	tolworthi	7	0	7	0
F7	15 days	2	tolworthi	7	0	7	0
F8	15 days	2	tolworthi	7	0	7	0
A1	15 days	2	control	7	0	7	0
A2	15 days	2	control	7	0	7	0
A3	15 days	2	control	7	0	7	0
A4	15 days	2	control	7	0	7	0
A5	15 days	2	control	7	0	7	0
A6	15 days	2	control	7	0	7	1
A7	15 days	2	control	7	0	7	0
A8	15 days	2	control	7	0	7	0
B1	15 days	2	control	6	0	6	1
B2	15 days	2	control	7	0	7	1
B3	15 days	2	control	7	0	7	0
B4	15 days	2	control	7	0	7	0
B5	15 days	2	control	7	0	7	0
B6	15 days	2	control	7	0	7	0
B7	15 days	2	control	7	0	7	0
B8	15 days	2	control	7	0	7	0
C1	15 days	2	control	7	0	7	0
C2	15 days	2	control	7	0	7	0
C3	15 days	2	control	7	0	7	0
C4	15 days	2	control	7	0	7	0
C6	15 days	2	control	7	0	7	0
C7	15 days	2	control	4	0	4	1
C8	15 days	2	control	4	0	4	1
D1	15 days	2	control	7	0	7	0
D2	15 days	2	control	7	0	7	0
D3	15 days	2	control	7	0	7	0
D4	15 days	2	control	7	0	7	0
D5	15 days	2	control	1	0	1	1
D6	15 days	2	control	7	0	7	0
D7	15 days	2	control	7	0	7	0
D8	15 days	2	control	7	0	7	0
E2	15 days	2	control	7	0	7	0
E3	15 days	2	control	7	0	7	0
E4	15 days	2	control	7	0	7	0
E5	15 days	2	control	7	0	7	0
E6	15 days	2	control	6	0	6	0
E7	15 days	2	control	7	0	7	0
E8	15 days	2	control	7	0	7	0
F1	15 days	2	control	7	0	7	0
F3	15 days	2	control	7	0	7	0
F4	15 days	2	control	7	0	7	0
F5	15 days	2	control	7	0	7	1
F6	15 days	2	control	7	0	7	0
F7	15 days	2	control	7	0	7	0
F8	15 days	2	control	1	0	1	1
